# Supplementary material for: Germ-Free Conditions Modulate Host Purine Metabolism, Exacerbating Adenine-Induced Kidney Damage
Source: PubMed Central journal article supplement (PMC7551802; doi:10.3390/toxins12090547), 2020-08-26
Supplement: toxins-12-00547-s001.pdf [file toxins-12-00547-s001.pdf]

# Supplementary Materials: Germ-Free Conditions Modulate Host Purine Metabolism, Exacerbating Adenine-Induced Kidney Damage

Eikan Mishima, Mariko Ichijo, Takeshi Kawabe, Koichi Kikuchi, Yukako Akiyama, Takafumi Toyohara, Takehiro Suzuki, Chitose Suzuki, Atsuko Asao, Naoto Ishii, Shinji Fukuda and Takaaki Abe

**Table S1.** Taqman probes used for quantitative PCR.

| <b>Gene</b>         | <b>Product Number</b> |
|---------------------|-----------------------|
| Mouse Xdh           | Mm00442110_m1         |
| Mouse Aprt          | Mm00782508_s1         |
| Mouse Hpvt          | Mm03024075_m1         |
| Mouse Prps1         | Mm00727494_s1         |
| Mouse Pnp1          | Mm00840006_m1         |
| Mouse Tgfb1         | Mm01178820_m1         |
| Mouse Col1a1        | Mm00801666_g1         |
| Mouse Fn1           | Mm01256744_m1         |
| Mouse Il17a         | Mm00439618_m1         |
| Mouse Il17f         | Mm00521423_m1         |
| Mouse Il23a         | Mm00518984_m1         |
| Mouse Il1a          | Mm00439620_m1         |
| Mouse Emr1 (Adgre1) | Mm00802529_m1         |
| Mouse Tnf           | Mm00443258_m1         |
| 18S rRNA            | Hs99999901_s1         |

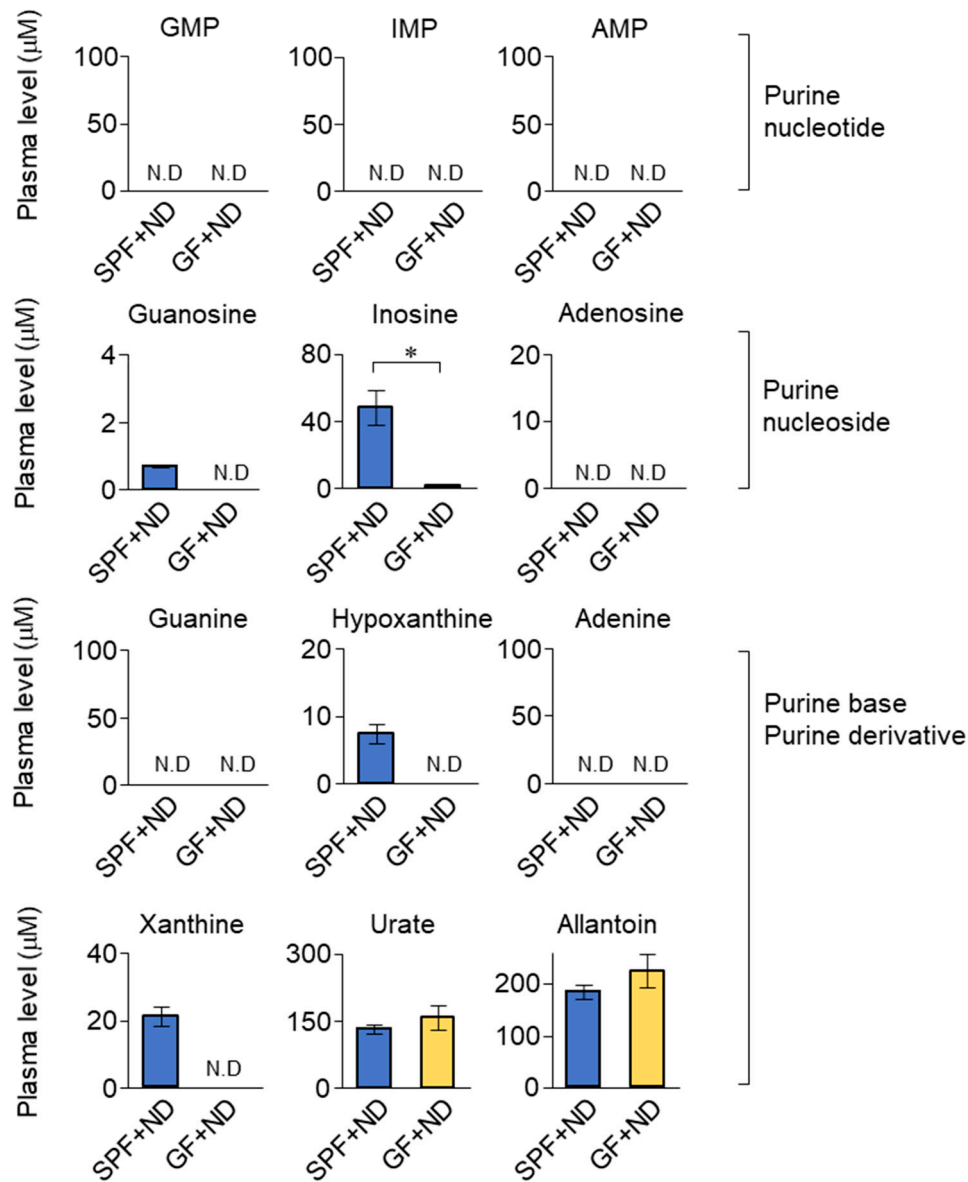

**Figure S1.** Plasma nucleotide metabolites in GF+ND and SPF+ND mice. \*  $p < 0.05$  compared between indicated groups ( $t$ -test). N.D, not detectable.

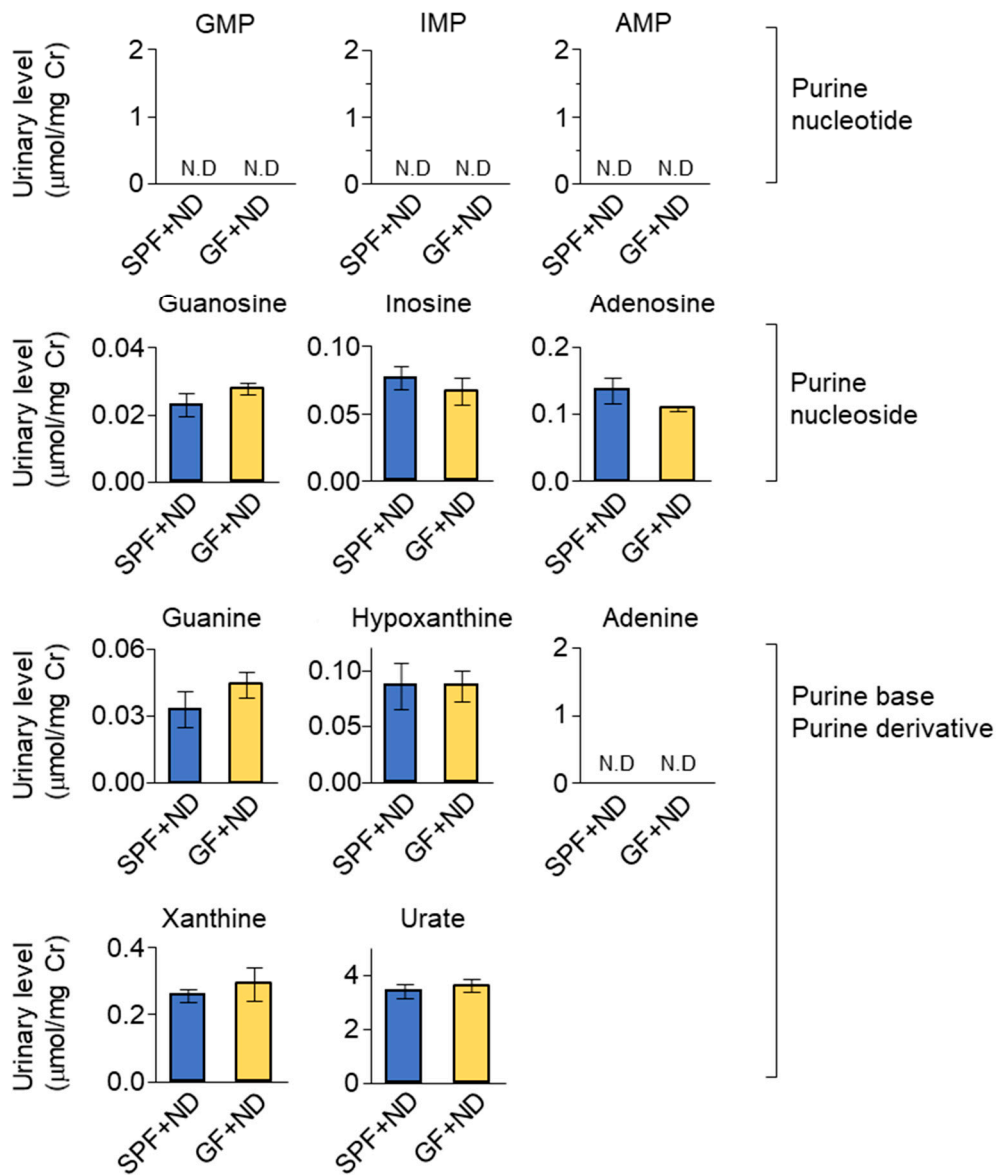

**Figure S2.** Urinary nucleotide metabolites in GF+ND and SPF+ND mice. Urinary concentrations were corrected urinary creatinine ( $\mu\text{mol/mg}$  urinary creatinine). \*  $p < 0.05$  compared between indicated groups ( $t$ -test). N.D, not detectable.
